# Supplementary material for: Benign solution-processed (BixSb1−x)2Se3 alloys for short-wavelength infrared mesoporous solar cells
Source: Royal Society of Chemistry journal article supplement (doi:10.1039/d2tc02312a), 2022-01-01
Supplement: d2tc02312a1.pdf [file d2tc02312a1.pdf]

## Supporting Information

### **Benign solution-processed $(\text{Bi}_x\text{Sb}_{1-x})_2\text{Se}_3$ alloys for short wavelength infrared mesoporous solar cells**

Jitendra Kumar, Omer Vana, Subila Kurukkal Balakrishnan, Eran Edri\*

Department of Chemical Engineering, Ben-Gurion University of the Negev, Beer Sheva-  
8410501, Israel

## Supporting information S1

Table S1. Composition ratio of  $(\text{Bi}_x\text{Sb}_{1-x})_2\text{Se}_3$  samples estimated from the EDS

| <i>Bi-salt molar concentration</i>                       | <b>0.00</b>  | <b>2.06</b>  | <b>5.15</b>  | <b>10.31</b> | <b>15.46</b> | <b>20.62</b> | <b>25.77</b> |
|----------------------------------------------------------|--------------|--------------|--------------|--------------|--------------|--------------|--------------|
| $x = \frac{\text{Bi}}{(\text{Bi} + \text{Sb})}$          | 0.00         | 0.04 ± 0.01  | 0.08 ± 0.02  | 0.11 ± 0.03  | 0.13 ± 0.01  | 0.14 ± 0.02  | 0.16 ± 0.01  |
| $\frac{(\text{Se} + \text{S})}{(\text{Bi} + \text{Sb})}$ | 1.49 ± 0.06  | 1.46 ± 0.08  | 1.46 ± 0.05  | 1.43 ± 0.05  | 1.50 ± 0.07  | 1.48 ± 0.03  | 1.52 ± 0.03  |
| $\frac{\text{Se}}{(\text{Se} + \text{S})}$               | 0.88 ± 0.01  | 0.86 ± 0.01  | 0.85 ± 0.01  | 0.86 ± 0.02  | 0.92 ± 0.01  | 0.93 ± 0.02  | 0.93 ± 0.01  |
| $\frac{\text{Se}}{(\text{Bi} + \text{Sb})}$              | 1.32 ± 0.05  | 1.26 ± 0.06  | 1.24 ± 0.05  | 1.22 ± 0.04  | 1.38 ± 0.07  | 1.37 ± 0.03  | 1.40 ± 0.04  |
| <i>Bi-salt molar concentration</i>                       | <b>30.92</b> | <b>41.23</b> | <b>51.54</b> | <b>61.85</b> | <b>72.15</b> | <b>82.46</b> | <b>92.77</b> |
| $x = \frac{\text{Bi}}{(\text{Bi} + \text{Sb})}$          | 0.19 ± 0.04  | 0.23 ± 0.02  | 0.23 ± 0.05  | 0.24 ± 0.04  | 0.26 ± 0.04  | 0.29 ± 0.02  | 0.30 ± 0.07  |
| $\frac{(\text{Se} + \text{S})}{(\text{Bi} + \text{Sb})}$ | 1.50 ± 0.06  | 1.43 ± 0.08  | 1.58 ± 0.05  | 1.54 ± 0.08  | 1.52 ± 0.06  | 1.52 ± 0.07  | 1.49 ± 0.04  |
| $\frac{\text{Se}}{(\text{Se} + \text{S})}$               | 0.91 ± 0.08  | 0.91 ± 0.02  | 0.82 ± 0.02  | 0.83 ± 0.04  | 0.80 ± 0.02  | 0.80 ± 0.01  | 0.77 ± 0.04  |
| $\frac{\text{Se}}{(\text{Bi} + \text{Sb})}$              | 1.37 ± 0.05  | 1.31 ± 0.07  | 1.28 ± 0.03  | 1.27 ± 0.09  | 1.21 ± 0.05  | 1.21 ± 0.07  | 1.15 ± 0.05  |

\*for Bi-salt  $[\text{Bi}(\text{NO}_3)_3 \cdot 5\text{H}_2\text{O}] > 41.23$  mM ( $x > 0.23$ ), formation of  $\text{Bi}_2\text{Se}_3$  secondary phase was observed in the  $(\text{Bi}_x\text{Sb}_{1-x})_2\text{Se}_3$  samples

## Supporting information S2

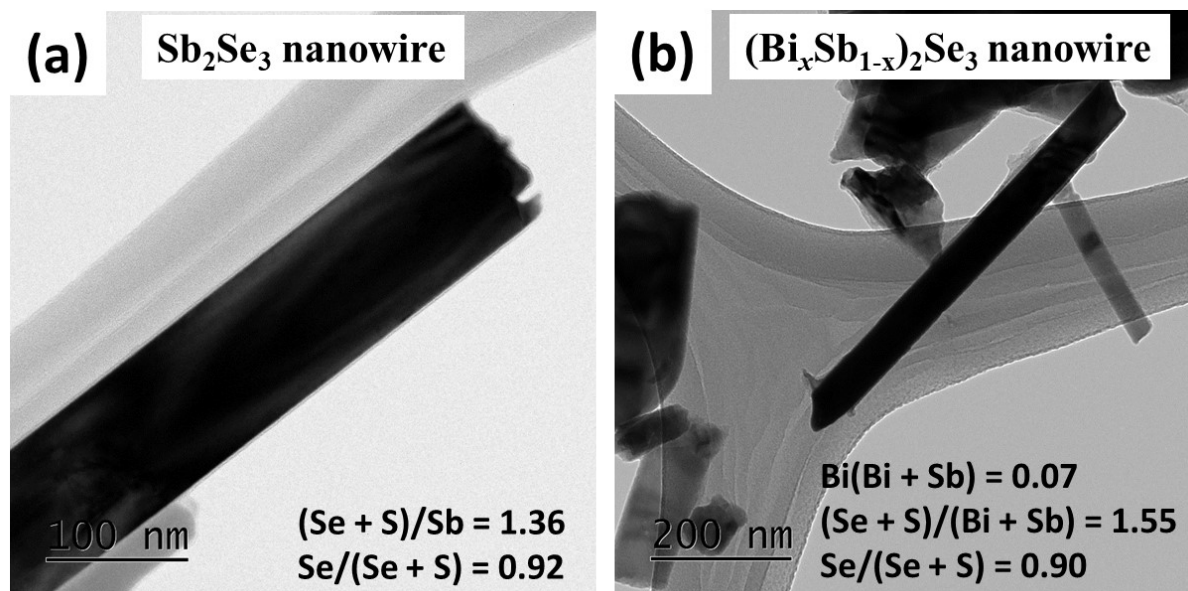

Figure S2. (a) and (b) are the TEM images of the  $\text{Sb}_2\text{Se}_3$  and  $(\text{Bi}_x\text{Sb}_{1-x})_2\text{Se}_3$  nanowires, respectively. EDS composition shows that there is an incorporation of sulfur and bismuth is inside the individual nanowires.

### Supporting information S3

To quantitatively understand the behaviour of the preferred orientation, the texture coefficient (TC) of the  $\text{Sb}_2\text{Se}_3$  sample film has been calculated using equation (1)

$$TC_{hkl} = \frac{I_{hkl}}{I_{0,hkl}} / \frac{1}{N} \sum_{i=1}^N \frac{I_{h_i k_i l_i}}{I_{0,h_i k_i l_i}} \quad (1)$$

Where  $I_{hkl}$  is the intensity of the diffraction peaks corresponding to  $hkl$  reflection  $I_{0,hkl}$  is the intensity of  $hkl$  reflection of the standard  $\text{Sb}_2\text{Se}_3$  (JCPDS no. 051-0861).  $N$  is the number of reflections considered for the calculation.

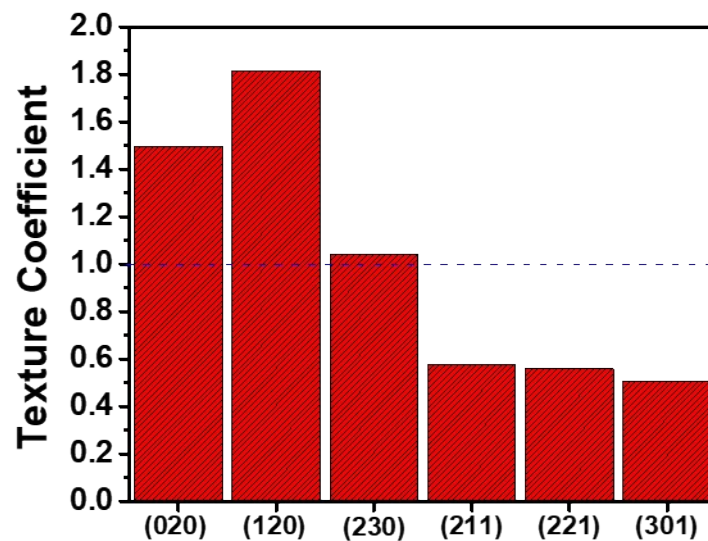

Figure S3. Texture coefficient (TC) of the  $\text{Sb}_2\text{Se}_3$  sample estimated for (hk0) and (hk1) family of planes

Supporting information S4

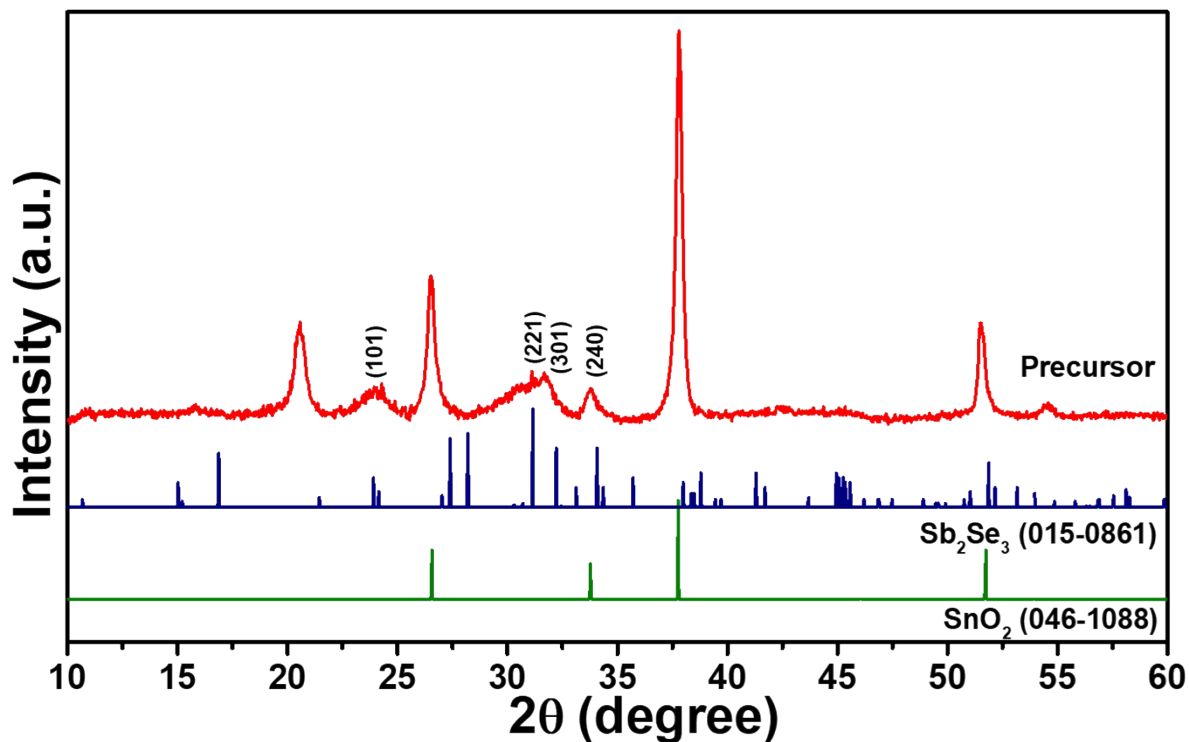

Figure S4. XRD pattern of the precursor samples deposited using the Sb-Se-ink by low-temperature heat-treatment at 100 °C for 3 min. The reference standard XRD pattern of Sb<sub>2</sub>Se<sub>3</sub> (JCPDS no. 015-0861) and SnO<sub>2</sub> (046-1088) is also shown at the bottom of plots.

Supporting information S5

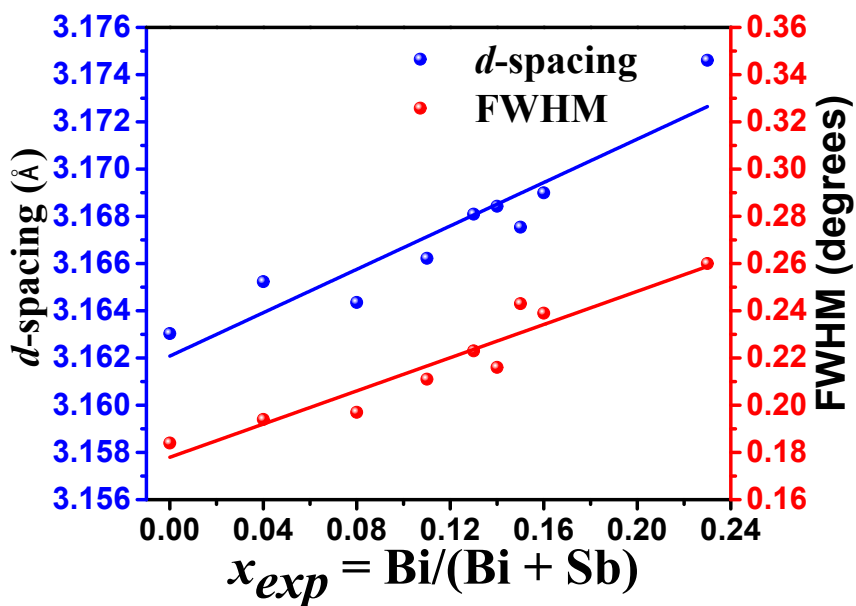

Figure S5. A plot of FWHM of X-ray diffraction peak from (221) plane at 31.13 degrees and the corresponding inter-planar spacing ( $d$ ) for different  $Bi$ -content in  $(Bi_xSb_{1-x})_2Se_3$  sample.

### Supporting information S6

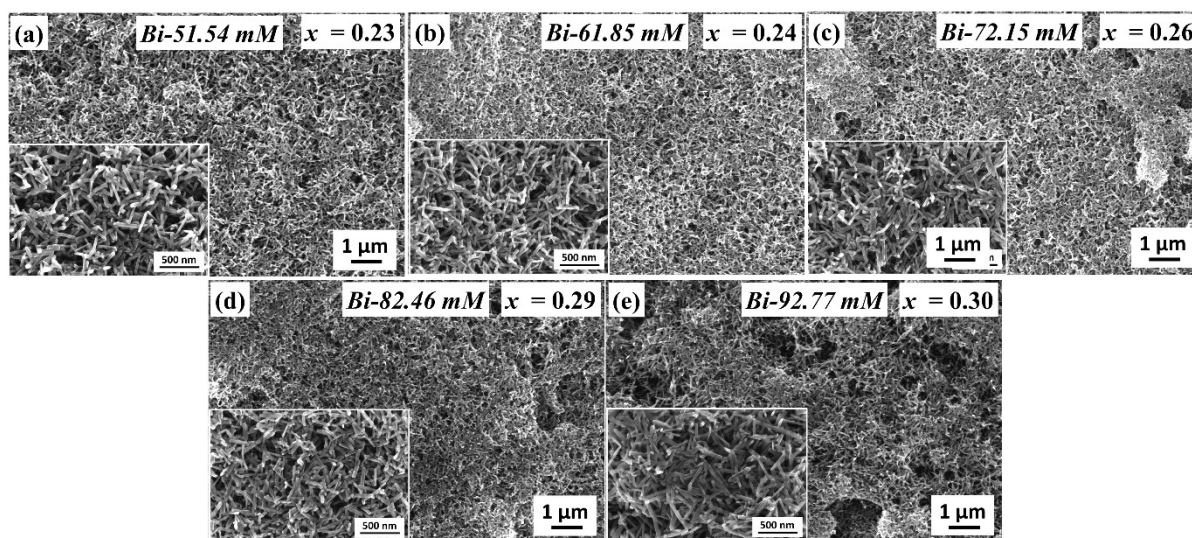

Figure S6. (a) – (e) Top view FESEM images of the  $(Bi_xSb_{1-x})_2Se_3$  samples for which we detect the presence of  $Bi_2Se_3$  secondary phase. The amount of  $Bi$ -salt used in  $Bi$ -stock solution and the experimentally estimated  $Bi$ -content [ $x = Bi/(Bi + Sb)$ ] are also mentioned on the top side of the images. Inset is a high-resolution FESEM image for a closer view. The composition ratios of these samples are mentioned in supporting information S1.

**Table S6.** Nanowires diameter estimated from the FESEM micrographs

| Bi-salt amount (mg)    | 250              | 300              | 350              | 400              | 450              |
|------------------------|------------------|------------------|------------------|------------------|------------------|
| Nanowire diameter (nm) | $40.78 \pm 8.67$ | $34.12 \pm 7.42$ | $36.78 \pm 7.51$ | $35.24 \pm 6.93$ | $41.51 \pm 9.05$ |

The diameter for the nanowire on an average remains nearly the same for the sample for which we have observed the formation of the  $Bi_2Se_3$  secondary phase.

### Supporting information S7

The optical bandgap of the  $(Bi_xSb_{1-x})_2Se_3$  thin films was estimated by measuring the diffuse reflectance on UV-Vis-NIR spectrophotometer.

Using Kubelka-Munk (KM) function the reflectance spectrum can be transformed to the corresponding absorption spectrum using eq. (1) [1]

$$(1) \quad F(R) = \alpha/S = (1 - R)^2/2R]$$

Using Tauc method the energy dependent absorption coefficient ( $\alpha$ ) can be expressed by following eq. (2) [2-3]

$$(2) \quad (\alpha hv)^{\frac{1}{n}} = B(hv - E_g)$$

Combining eq1 and eq2

$$(3) \quad [F(R)hv]^{\frac{1}{n}} = B(hv - E_g)$$

The value of n is equal to 1/2 or 2 for the direct and indirect transition bandgaps, respectively.

The bandgaps were estimated by a linear fit of the linear part of the KM plot. Errors for the bandgaps are estimate by shifting the fitting range by  $\pm 10$  meV.

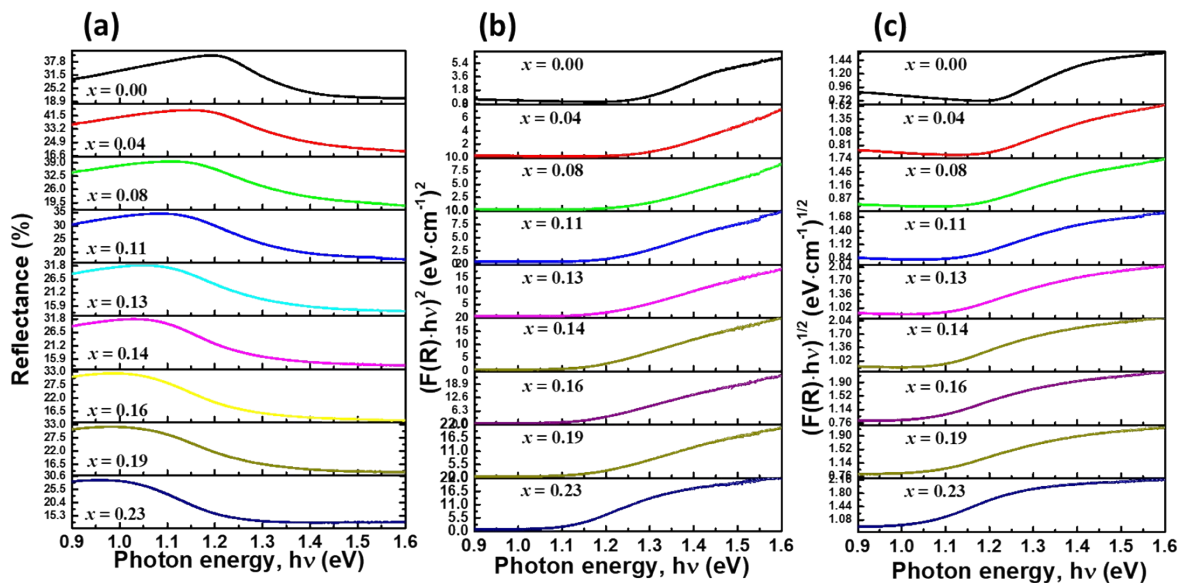

Figure S7. Reflectance and corresponding KM plot for various amount of Bi-content in  $(Bi_xSb_{1-x})_2Se_3$  samples (b) for direct bandgap ( $n = 1/2$ ) (c) for indirect bandgap ( $n = 2$ ).

1. E.N. Davis, Developments in Applied Spectroscopy, Springer US, 1965. <https://doi.org/10.1007/978-1-4684-8691-9>
2. J. Tauc, R. Grigorovici, A. Vancu, Optical Properties and Electronic Structure of Amorphous Germanium, Phys. Status Solidi. 15 (1966) 627–637. <https://doi.org/10.1002/pssb.19660150224>.

3. N.F. Mott, E.A. Davis, Conduction in non-crystalline systems V. Conductivity, optical absorption and photoconductivity in amorphous semiconductors, *Philos. Mag.* 22 (1970) 903–922. <https://doi.org/10.1080/14786437008221061>.

### Supporting information S8

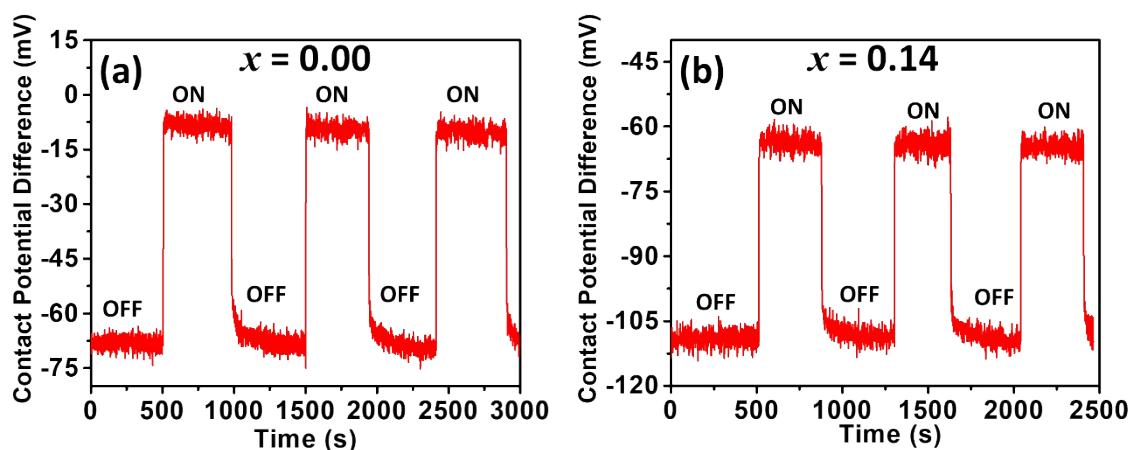

Figure S8. Surface photovoltage of  $\text{Sb}_2\text{Se}_3$  ( $x = 0.00$ ) and Bi-incorporated  $\text{Sb}_2\text{Se}_3$  nanowires ( $x = 0.14$ ) measured in dark and under the illumination of 700 nm light source. The measurement indicates the p-type behavior as both  $\text{Sb}_2\text{Se}_3$  and Bi-incorporated  $\text{Sb}_2\text{Se}_3$  have a positive surface voltage (SPV) value ( $\text{CPD}_{\text{light}} - \text{CPD}_{\text{dark}}$ ).

### Supporting information S9

**Table S9-I.**  $(\text{Bi}_x\text{Sb}_{1-x})_2\text{Se}_3$  ( $x = 0.00$ ) nanowire solar cell performance parameters ( $PCE$  is power conversion efficiency,  $J_{sc}$  is short circuit current,  $FF$  is fill factor,  $R_{sh}$  is shunt resistance,  $R_s$  is series resistance). The cell with the highest  $PCE$  has been highlighted.

| Solar cell | $PCE$ (%)   | $FF$ (%)     | $J_{sc}$ ( $\text{mA}/\text{cm}^2$ ) | $V_{oc}$ (mV) | $R_{sh}$ ( $\Omega \cdot \text{cm}^2$ ) | $R_s$ ( $\Omega \cdot \text{cm}^2$ ) |
|------------|-------------|--------------|--------------------------------------|---------------|-----------------------------------------|--------------------------------------|
| Cell 1     | 0.08        | 37.47        | -0.67                                | 314.27        | 1214.37                                 | 204.57                               |
| Cell 2     | 0.05        | 34.24        | -0.55                                | 276.08        | 977.87                                  | 264.24                               |
| Cell 3     | 0.06        | 32.50        | -0.71                                | 241.86        | 534.14                                  | 192.55                               |
| Cell 4     | <b>0.15</b> | <b>39.59</b> | <b>-1.11</b>                         | <b>343.82</b> | <b>856.13</b>                           | <b>114.53</b>                        |
| Cell 5     | 0.02        | 27.99        | -1.03                                | 086.51        | 98.45                                   | 64.51                                |

**Table S9-II.**  $(\text{Bi}_x\text{Sb}_{1-x})_2\text{Se}_3$  ( $x = 0.23$ ) nanowire solar cell performance parameters ( $PCE$  is power conversion efficiency,  $J_{sc}$  is short circuit current,  $FF$  is fill factor,  $R_{sh}$  is shunt resistance,  $R_s$  is series resistance). The cell with the highest  $PCE$  has been highlighted.

| Solar cell | $PCE$ (%)   | $FF$ (%)     | $J_{sc}$ ( $\text{mA}/\text{cm}^2$ ) | $V_{oc}$ (mV) | $R_{sh}$ ( $\Omega \cdot \text{cm}^2$ ) | $R_s$ ( $\Omega \cdot \text{cm}^2$ ) |
|------------|-------------|--------------|--------------------------------------|---------------|-----------------------------------------|--------------------------------------|
| Cell 1     | 0.10        | 34.93        | -0.88                                | 313.39        | 725.68                                  | 184.56                               |
| Cell 2     | 0.08        | 34.01        | -0.84                                | 293.63        | 652.33                                  | 186.40                               |
| Cell 3     | <b>0.10</b> | <b>34.16</b> | <b>-0.86</b>                         | <b>343.30</b> | <b>742.58</b>                           | <b>212.77</b>                        |
| Cell 4     | 0.01        | 26.16        | -0.41                                | 54.51         | 138.50                                  | 119.73                               |
| Cell 5     | 0.06        | 33.52        | -0.57                                | 322.89        | 961.12                                  | 281.13                               |

|        |      |       |       |        |         |        |
|--------|------|-------|-------|--------|---------|--------|
| Cell 6 | 0.09 | 39.25 | -0.58 | 379.63 | 1776.83 | 247.59 |
| Cell 7 | 0.06 | 33.49 | -0.57 | 316.02 | 985.70  | 292.20 |

---
